# Supplementary material for: Potential of Thuja occidentalis L. Essential Oil and Water Extracts against Field Crop Pests
Source: MDPI journal article supplement (doi:10.3390/molecules29071457), 2024-03-24
Supplement: s1 [file s1]

**Table S1.** Statistical analysis on the survival of *Aphis fabae* Scop. nymphs under EOTO and WETOs.

| Hours | Sum of Squares | df | Mean Square | F     | p        |
|-------|----------------|----|-------------|-------|----------|
| EOTO  |                |    |             |       |          |
| 6h    | 162.50         | 4  | 40.63       | 0.643 | 0.638295 |
| 18h   | 160.00         | 4  | 40.00       | 0.463 | 0.761716 |
| 30h   | 540.83         | 4  | 135.21      | 1.314 | 0.300517 |
| 42h   | 1700.83        | 4  | 425.21      | 2.247 | 0.102172 |
| 54h   | 3118.71        | 4  | 779.68      | 2.930 | 0.048181 |
| 66h   | 4322.83        | 4  | 1080.71     | 4.173 | 0.013628 |
| 78h   | 3910.88        | 4  | 977.72      | 3.292 | 0.032860 |
| 90h   | 5098.15        | 4  | 1274.54     | 2.955 | 0.046899 |
| 102h  | 2545.61        | 4  | 636.40      | 0.584 | 0.677806 |
| WETOs |                |    |             |       |          |
| 6h    | 121.76         | 6  | 20.29       | 0.731 | 0.627985 |
| 18h   | 591.38         | 6  | 98.56       | 1.853 | 0.117141 |
| 30h   | 544.35         | 6  | 90.73       | 1.449 | 0.224230 |
| 42h   | 901.93         | 6  | 150.32      | 1.954 | 0.099287 |
| 54h   | 1725.46        | 6  | 287.58      | 0.980 | 0.453539 |
| 66h   | 1600.79        | 6  | 266.80      | 0.520 | 0.789441 |
| 78h   | 3288.49        | 6  | 548.08      | 0.633 | 0.702634 |
| 90h   | 2772.19        | 6  | 462.03      | 0.590 | 0.735892 |
| 102h  | 1993.27        | 6  | 332.21      | 0.373 | 0.890834 |

**Table S2.** Statistical analysis on the survival of wingless females of *Aphis fabae* Scop. under EOTO and WETOs.

| Hours | Sum of Squares | df | Mean Square | F      | p        |
|-------|----------------|----|-------------|--------|----------|
| EOTO  |                |    |             |        |          |
| 6h    | 33566.67       | 4  | 8391.67     | 13.535 | 0.000005 |
| 18h   | 34180.00       | 4  | 8545.00     | 13.052 | 0.000007 |
| 30h   | 34420.00       | 4  | 8605.00     | 12.568 | 0.000010 |
| 42h   | 40046.67       | 4  | 10011.67    | 21.484 | 0.000000 |
| 54h   | 41259.42       | 4  | 10314.86    | 30.858 | 0.000000 |
| 66h   | 43012.76       | 4  | 10753.19    | 26.835 | 0.000000 |
| 78h   | 30206.34       | 4  | 7551.58     | 19.286 | 0.000000 |
| 90h   | 15518.77       | 4  | 3879.69     | 11.999 | 0.000014 |
| 102h  | 7309.05        | 4  | 1827.26     | 9.668  | 0.000072 |
| WETOs |                |    |             |        |          |
| 6h    | 80.95          | 6  | 13.49       | 1.090  | 0.387680 |
| 18h   | 123.81         | 6  | 20.63       | 0.774  | 0.595808 |
| 30h   | 314.29         | 6  | 52.38       | 1.058  | 0.406083 |
| 42h   | 761.90         | 6  | 126.98      | 1.918  | 0.105233 |
| 54h   | 3857.14        | 6  | 642.86      | 4.219  | 0.002695 |
| 66h   | 9447.62        | 6  | 1574.60     | 3.391  | 0.009635 |
| 78h   | 11123.81       | 6  | 1853.97     | 3.929  | 0.004182 |
| 90h   | 7328.57        | 6  | 1221.43     | 5.910  | 0.000244 |
| 102h  | 1400.00        | 6  | 233.33      | 2.988  | 0.018339 |

**Table S3.** Statistical analysis on survival of females of *Leptinotarsa decemlineata* Say under EOTO and WETOs.

| Hours | Sum of Squares | df | Mean Square | F      | p        |
|-------|----------------|----|-------------|--------|----------|
| EOTO  |                |    |             |        |          |
| 48h   | 30919.54       | 4  | 7729.89     | 11.131 | 0.000030 |
| 72h   | 27931.03       | 4  | 6982.76     | 5.586  | 0.002524 |
| 96h   | 15413.79       | 4  | 3853.45     | 1.623  | 0.201092 |
| WETOs |                |    |             |        |          |

|     |          |   |         |       |          |
|-----|----------|---|---------|-------|----------|
| 48h | 2857.14  | 6 | 476.19  | 0.833 | 0.554465 |
| 72h | 2857.14  | 6 | 476.19  | 0.833 | 0.554465 |
| 96h | 10857.14 | 6 | 1809.52 | 0.905 | 0.505569 |

**Table S4.** Statistical analysis on survival of males of *Leptinotarsa decemlineata* Say under EOTO and WETOs.

| Hours | Sum of Squares | df | Mean Square | F     | p        |
|-------|----------------|----|-------------|-------|----------|
| EOTO  |                |    |             |       |          |
| 72h   | 6666.67        | 4  | 1666.67     | 1.190 | 0.339322 |
| 96h   | 30000.00       | 4  | 7500.00     | 4.167 | 0.010117 |
| WETOs |                |    |             |       |          |
| 96h   | 25714.29       | 6  | 4285.71     | 3.333 | 0.013239 |

**Table S5.** Statistical analysis on the mass of leaves eaten by one female of *Leptinotarsa decemlineata* Say [g] under EOTO and WETOs.

| Hours | Sum of Squares | df | Mean Square | F     | p        |
|-------|----------------|----|-------------|-------|----------|
| EOTO  |                |    |             |       |          |
| 24h   | 0.02297        | 4  | 0.00574     | 0.347 | 0.843482 |
| 48h   | 0.01120        | 4  | 0.00280     | 0.200 | 0.934988 |
| 72h   | 0.11812        | 4  | 0.02953     | 0.925 | 0.472290 |
| 96h   | 0.23631        | 4  | 0.05908     | 1.588 | 0.225640 |
| WETOs |                |    |             |       |          |
| 24h   | 0.15263        | 6  | 0.02544     | 1.102 | 0.38583  |
| 48h   | 0.10190        | 6  | 0.01698     | 0.779 | 0.59317  |
| 72h   | 0.24259        | 6  | 0.04043     | 2.117 | 0.08551  |
| 96h   | 0.18048        | 6  | 0.03008     | 0.920 | 0.49694  |

**Table S6.** Statistical analysis on the mass of leaves eaten by one male of *Leptinotarsa decemlineata* Say [g] under EOTO and WETOs.

| Hours | Sum of Squares | df | Mean Square | F     | p        |
|-------|----------------|----|-------------|-------|----------|
| EOTO  |                |    |             |       |          |
| 24h   | 0.01714        | 4  | 0.00428     | 0.414 | 0.796584 |
| 48h   | 0.01850        | 4  | 0.00462     | 0.414 | 0.797031 |
| 72h   | 0.69104        | 4  | 0.17276     | 4.202 | 0.011206 |
| 96h   | 0.80384        | 4  | 0.20096     | 4.453 | 0.009207 |
| WETOs |                |    |             |       |          |
| 24h   | 0.03307        | 6  | 0.00551     | 0.385 | 0.882094 |
| 48h   | 0.02493        | 6  | 0.00416     | 0.296 | 0.933579 |
| 72h   | 0.02755        | 6  | 0.00459     | 0.295 | 0.934206 |
| 96h   | 0.02954        | 6  | 0.00492     | 0.230 | 0.963432 |

**Table S7.** Statistical analysis on body weight change of females and males of *Leptinotarsa decemlineata* Say [g] under EOTO and WETOs.

|         | Sum of Squares | df | Mean Square | F     | p        |
|---------|----------------|----|-------------|-------|----------|
| EOTO    |                |    |             |       |          |
| females | 0.00246        | 4  | 0.00062     | 1.682 | 0.20042  |
| males   | 0.00259        | 4  | 0.00065     | 2.074 | 0.11881  |
| WETOs   |                |    |             |       |          |
| females | 0.00341        | 6  | 0.00057     | 1.246 | 0.332143 |
| males   | 0.00049        | 6  | 0.00008     | 1.012 | 0.448394 |

**Table S8.** Statistical analysis on survival of females of *Sitona lineatus* L. under EOTO.

| Hours | Sum of Squares | df | Mean Square | F      | p        |
|-------|----------------|----|-------------|--------|----------|
| 12h   | 45333.33       | 4  | 11333.33    | 34.000 | 0.000000 |

**Table S9.** Statistical analysis on survival of males of *Sitona lineatus* L. under EOTO.

| Hours | Sum of Squares | df | Mean Square | F      | p        |
|-------|----------------|----|-------------|--------|----------|
| 12h   | 43333.33       | 4  | 10833.33    | 11.607 | 0.000018 |
| 24h   | 48000.00       | 4  | 12000.00    | 13.846 | 0.000004 |

**Table S10.** Statistical analysis on the surface area of places eaten in leaves by one male of *Sitona lineatus* L. under EOTO and WETOs.

| Hours | Sum of Squares | df | Mean Square | F     | p        |
|-------|----------------|----|-------------|-------|----------|
| EOTO  |                |    |             |       |          |
| 12h   | 418.85         | 4  | 104.71      | 2.935 | 0.040593 |
| 24h   | 832.18         | 3  | 277.39      | 3.519 | 0.039422 |
| 36h   | 5548.77        | 3  | 1849.59     | 6.672 | 0.004428 |
| 48h   | 8346.91        | 3  | 2782.30     | 5.990 | 0.006822 |
| 60h   | 10474.14       | 3  | 3491.38     | 5.618 | 0.008722 |
| 72h   | 14565.80       | 3  | 4855.27     | 4.836 | 0.015041 |
| 84h   | 30928.00       | 3  | 10309.33    | 4.133 | 0.025383 |
| 96h   | 43226.23       | 3  | 14408.74    | 4.318 | 0.022049 |
| 108h  | 62569.44       | 3  | 20856.48    | 4.764 | 0.015842 |
| WETOs |                |    |             |       |          |
| 12h   | 104.39         | 6  | 17.40       | 2.126 | 0.083044 |
| 24h   | 3146.53        | 6  | 524.42      | 1.312 | 0.285802 |
| 36h   | 11213.24       | 6  | 1868.87     | 2.817 | 0.029241 |
| 48h   | 12703.78       | 6  | 2117.30     | 3.013 | 0.021888 |
| 60h   | 33139.09       | 6  | 5523.18     | 1.990 | 0.102282 |
| 72h   | 48459.41       | 6  | 8076.57     | 2.725 | 0.033539 |
| 84h   | 54564.52       | 6  | 9094.09     | 1.789 | 0.139109 |
| 96h   | 51973.54       | 6  | 8662.26     | 1.199 | 0.337864 |
| 108h  | 74795.66       | 6  | 12465.94    | 1.421 | 0.244602 |

**Table S11.** Statistical analysis on the surface area of places eaten in leaves by one female of *Sitona lineatus* L. under EOTO and WETOs.

| Hours | Sum of Squares | df | Mean Square | F     | p        |
|-------|----------------|----|-------------|-------|----------|
| EOTO  |                |    |             |       |          |
| 12h   | 4451.48        | 4  | 1112.87     | 6.135 | 0.001393 |
| 24h   | 12040.56       | 3  | 4013.52     | 4.916 | 0.010775 |
| 36h   | 18261.52       | 3  | 6087.17     | 4.308 | 0.017717 |
| 48h   | 30267.29       | 3  | 10089.10    | 3.456 | 0.037066 |
| 60h   | 49713.71       | 3  | 16571.24    | 3.674 | 0.031747 |
| 72h   | 53376.68       | 3  | 17792.23    | 3.424 | 0.039513 |
| 84h   | 111606.35      | 3  | 37202.12    | 2.850 | 0.066391 |
| 96h   | 149103.80      | 3  | 49701.27    | 3.153 | 0.050323 |
| 108h  | 212346.02      | 3  | 70782.01    | 3.810 | 0.028247 |
| WETOs |                |    |             |       |          |
| 12h   | 257.32         | 6  | 42.89       | 1.286 | 0.305864 |
| 24h   | 7864.62        | 6  | 1310.77     | 2.829 | 0.035338 |
| 36h   | 25103.84       | 6  | 4183.97     | 2.423 | 0.061469 |
| 48h   | 39255.12       | 6  | 6542.52     | 2.761 | 0.038681 |

|      |           |   |          |       |          |
|------|-----------|---|----------|-------|----------|
| 60h  | 104438.65 | 6 | 17406.44 | 3.228 | 0.020873 |
| 72h  | 141384.59 | 6 | 23564.10 | 2.989 | 0.028535 |
| 84h  | 231143.51 | 6 | 38523.92 | 3.117 | 0.024118 |
| 96h  | 244141.80 | 6 | 40690.30 | 2.349 | 0.068108 |
| 108h | 351738.02 | 6 | 58623.00 | 2.632 | 0.046120 |

**Table S12.** Statistical analysis on the absolute deterrence index for males and females of *Sitona lineatus* L. (mean for all dates of observations) under EOTO and WETOs.

|         | Sum of Squares | df | Mean Square | F       | p        |
|---------|----------------|----|-------------|---------|----------|
| EOTO    |                |    |             |         |          |
| males   | 31103.10       | 3  | 10367.70    | 192.004 | 0.000000 |
| females | 29779.29       | 3  | 9926.43     | 61.901  | 0.000000 |
| WETOs   |                |    |             |         |          |
| males   | 12665.57       | 5  | 2533.11     | 4.642   | 0.001551 |
| females | 10471.35       | 5  | 2094.27     | 9.728   | 0.000002 |

**Table S13.** Statistical analysis on the number of aphids eaten by one 3-days larvae of *Harmonia axyridis* Pallas under EOTO.

| Hours | Sum of Squares | df | Mean Square | F     | p        |
|-------|----------------|----|-------------|-------|----------|
| 6h    | 0.77778        | 2  | 0.38889     | 1.029 | 0.381124 |
| 18h   | 0.77778        | 2  | 0.38889     | 0.357 | 0.705464 |
| 30h   | 9.33333        | 2  | 4.66667     | 4.078 | 0.038530 |
| 42h   | 0.11111        | 2  | 0.05556     | 0.049 | 0.952314 |
| 54h   | 4.77778        | 2  | 2.38889     | 1.181 | 0.333862 |
| 66h   | 5.44444        | 2  | 2.72222     | 0.309 | 0.738777 |
| 78h   | 0.44444        | 2  | 0.22222     | 0.039 | 0.961788 |
| 90h   | 12.00000       | 2  | 6.00000     | 0.365 | 0.700121 |
| 102h  | 2.33333        | 2  | 1.16667     | 0.056 | 0.946015 |
| 114h  | 10.11111       | 2  | 5.05556     | 1.071 | 0.367604 |
| Total | 52.11111       | 2  | 26.05556    | 0.143 | 0.867939 |
| Mean  | 0.52111        | 2  | 0.26056     | 0.143 | 0.867939 |
